# Supplementary material for: Consistent Prebiotic Effects of Carrot RG-I on the Gut Microbiota of Four Human Adult Donors in the SHIME® Model despite Baseline Individual Variability
Source: MDPI journal article supplement (doi:10.3390/microorganisms9102142), 2021-10-13
Supplement: s1 [file microorganisms-1389152-supplementary.pdf › microorganisms-1389152-supplementary.pdf]

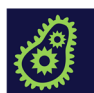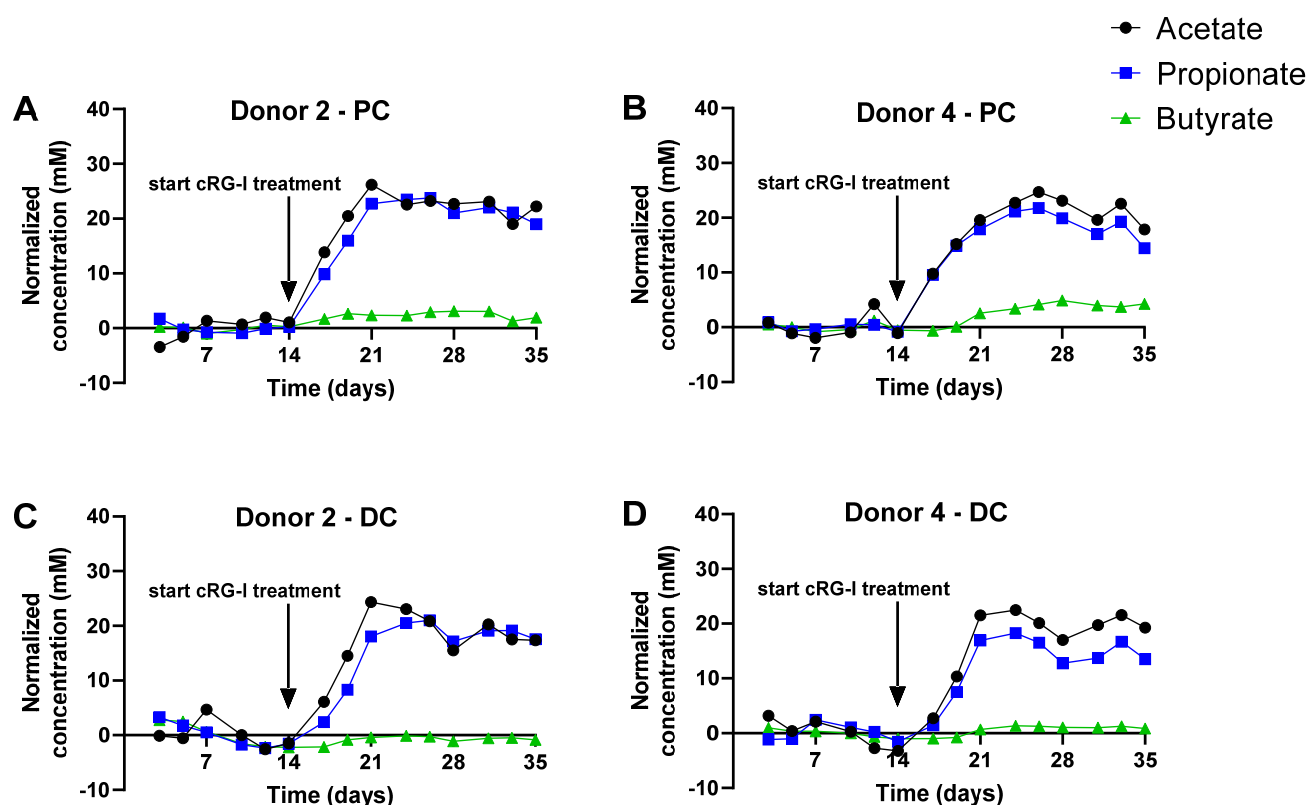

Figure S1. Effect of fermentation of cRG-I on SCFA production in the simulated proximal (panels A/B) and distal colon (panels C/D) during the control (days 0–14) and treatment periods (days 14–35) of the quad-M-SHIME simulating donors 2 (panels A/C) and 4 (panels B/D). Data are expressed as normalized values versus the average of the control period. Arrows indicate the start of the cRG-I treatment. cRG-I = carrot-derived Rhamnogalacturonan I, DC = distal colon, PC = proximal colon. The absolute values on which the normalized concentrations are based are shown in Figure S2 B/D/F/H.

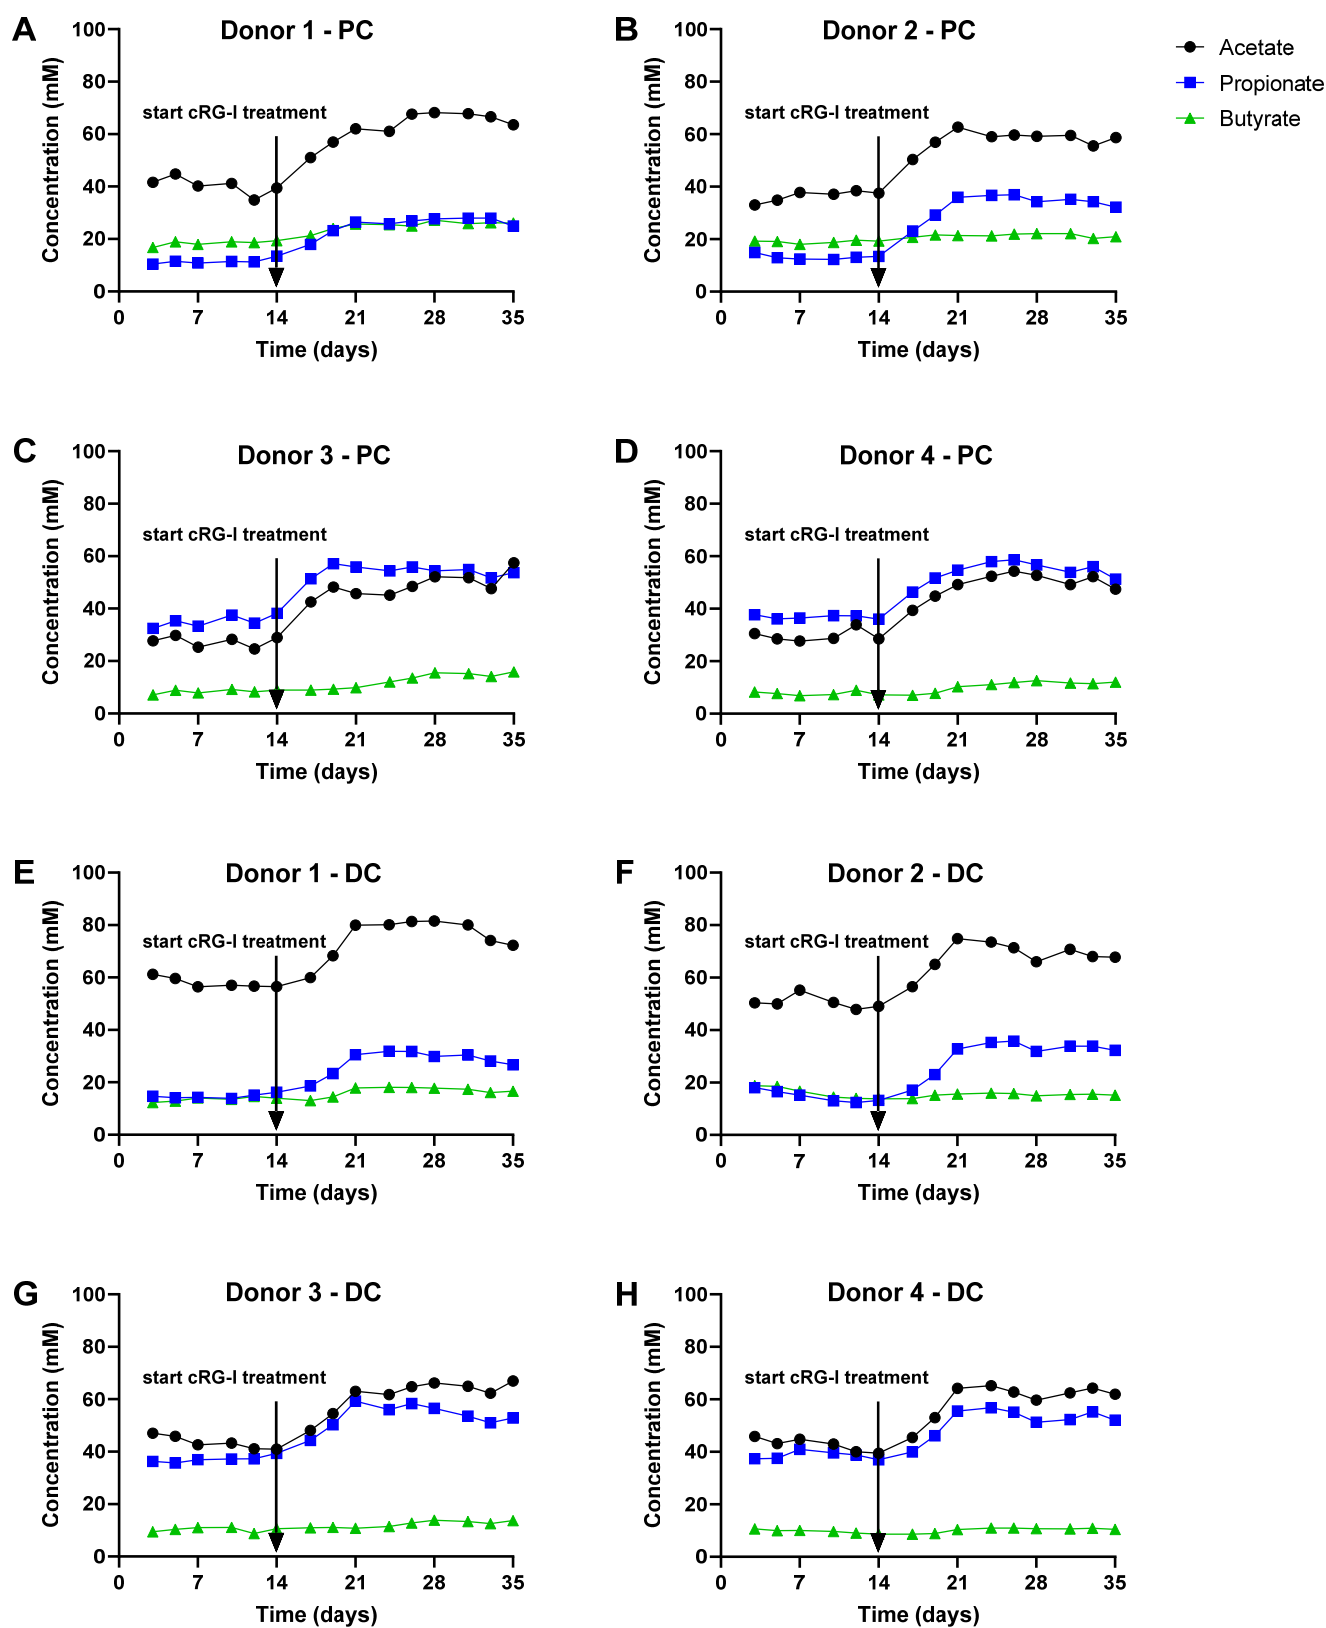

Figure S2. Effect of fermentation of cRG-I on absolute SCFA levels in the simulated proximal (pannels A/B/C/D) and distal (pannels E/F/G/H) colon during the control (days 0-14) and treatment periods (days 14-35) of the quad-M-SHIME simulating donors 1 (pannels A/E), 2 (pannels B/F), 3 (pannels C/G) and 4 (pannels D/H). Arrows indicate the start of the cRG-I treatment. cRG-I = carrot-derived Rhamnogalacturonan I, DC = distal colon, PC = proximal colon.

**Table S1. Microbial composition (10 most abundant families across all samples) in the lumen (%) of the simulated proximal (PC) and distal colon (DC) of the quad-M-SHIME.** Values presented are the averages at the end of the control period (day 14) for each of the four human adult donors (donors 1, 2, 3 and 4) tested in technical triplicate.

| Family                     | PC    |       |       |       | DC    |       |       |       |
|----------------------------|-------|-------|-------|-------|-------|-------|-------|-------|
|                            | 1     | 2     | 3     | 4     | 1     | 2     | 3     | 4     |
| <i>Bifidobacteriaceae</i>  | 36.8% | 45.5% | 8.0%  | 2.7%  | 36.9% | 39.4% | 7.5%  | 4.7%  |
| <i>Bacteroidaceae</i>      | 24.9% | 5.5%  | 2.5%  | 1.0%  | 16.3% | 7.1%  | 3.4%  | 6.0%  |
| <i>Prevotellaceae</i>      | 0.0%  | 16.4% | 15.2% | 24.7% | 0.0%  | 11.5% | 1.8%  | 3.4%  |
| <i>Acidaminococcaceae</i>  | 1.1%  | 2.7%  | 0.2%  | 0.0%  | 0.9%  | 2.8%  | 0.6%  | 0.4%  |
| <i>Lachnospiraceae</i>     | 24.8% | 26.1% | 12.3% | 8.2%  | 21.7% | 15.1% | 12.3% | 12.4% |
| <i>Ruminococcaceae</i>     | 0.1%  | 0.1%  | 0.0%  | 0.1%  | 1.6%  | 8.5%  | 6.0%  | 2.7%  |
| <i>Veillonellaceae</i>     | 9.1%  | 1.1%  | 61.3% | 62.8% | 0.3%  | 0.2%  | 56.9% | 62.0% |
| <i>Desulfovibrionaceae</i> | 1.1%  | 0.7%  | 0.0%  | 0.0%  | 0.8%  | 1.8%  | 0.7%  | 1.2%  |
| <i>Synergistaceae</i>      | 1.2%  | 0.1%  | 0.0%  | 0.0%  | 11.1% | 8.0%  | 5.2%  | 3.2%  |
| <i>Akkermansiaceae</i>     | 0.0%  | 0.0%  | 0.0%  | 0.0%  | 7.9%  | 0.3%  | 0.0%  | 0.2%  |

**Table S2. Growth of single *Bifidobacterium* strains in LMG medium 144 containing glucose (positive control), no carbon source (negative control) or with cRG-I instead of glucose.** Growth was scored with + and ++, with unclear growth being indicated by ?. T designates Type strains.

| Test strain                              |            |      | Carbon source |   |       |
|------------------------------------------|------------|------|---------------|---|-------|
| Species                                  | LMG number | Type | Glucose       | - | cRG-I |
| <i>Bifidobacterium adolescentis</i>      | LMG 10502  | T    | ++            | - | -     |
|                                          | LMG 10733  |      | ++            | - | -     |
|                                          | LMG 30678  |      | +             | - | -     |
| <i>Bifidobacterium angulatum</i>         | LMG 11039  | T    | +             | - | -     |
| <i>Bifidobacterium animalis lactis</i>   | LMG 18314  | T    | ++            | - | -     |
|                                          | LMG 25753  |      | ++            | - | -     |
| <i>Bifidobacterium bifidum</i>           | LMG 11041  | T    | +             | - | ?     |
|                                          | LMG 25759  |      | ++            | - | ?     |
| <i>Bifidobacterium breve</i>             | LMG 13194  | T    | +             | - | -     |
|                                          | LMG 13208  |      | +             | - | -     |
|                                          | LMG 25761  |      | ++            | - | -     |
| <i>Bifidobacterium catenulatum</i>       | LMG 11043  | T    | ++            | - | -     |
| <i>Bifidobacterium longum infantis</i>   | LMG 11570  | T    | ++            | - | -     |
|                                          | LMG 25762  |      | ++            | - | -     |
|                                          | LMG 8811   |      | ++            | - | -     |
| <i>Bifidobacterium longum longum</i>     | LMG 13196  | T    | ++            | - | -     |
|                                          | LMG 13197  |      | ++            | - | -     |
|                                          | LMG 25763  |      | ++            | - | -     |
| <i>Bifidobacterium longum suis</i>       | LMG 21814  | T    | ++            | - | -     |
| <i>Bifidobacterium pseudocatenulatum</i> | LMG 10505  | T    | +             | - | ?     |
